# Supplementary material for: Tunable sulphur doping in CuFe2O4 for the efficient removal of arsenic through arsenomolybdate complex adsorption: kinetics, isothermal and mechanistic studies
Source: Royal Society of Chemistry journal article supplement (doi:10.1039/d2ew00978a), 2023-01-01
Supplement: d2ew00978a1.pdf [file d2ew00978a1.pdf]

## Supporting Information

### **Tunable Sulphur Doping in $\text{CuFe}_2\text{O}_4$ for Efficient Removal of Arsenic through Arsenomolybdate Complex Adsorption: Kinetics, Isothermal and Mechanistic Studies**

Ujala Quyyum<sup>a</sup>, Khezina Rafiq<sup>a\*</sup>, Muhammad Zeeshan Abid<sup>a</sup>, Farooq Ahmad<sup>a</sup>, Abdul Rauf<sup>a</sup>, Ejaz Hussain<sup>a\*</sup>

<sup>a</sup>Institute of Chemistry, Inorganic Materials Laboratory 52S, The Islamia University of Bahawalpur-63100, Pakistan

Corresponding authors email:

[ejaz.hussain@iub.edu.pk](mailto:ejaz.hussain@iub.edu.pk),

[khezina.rafiq@iub.edu.pk](mailto:khezina.rafiq@iub.edu.pk)

### **Section 1**

**Confirmation through arsenic Quick<sup>TM</sup> kit:** The sample of water (treated water with adsorbent) was taken and added in the reaction bottle up to marked line. The first chemical, level 3 pink spoonfuls (present in kit box), was then added to the reactions bottles. The reaction bottles were then tightly sealed and vigorously shaken for 10 seconds, allowing the sample to settle to overcome sulfide interference. After that 3 level white spoonful of chemical no 3 zinc mesh was added into the reaction bottle and then capped tightly and shaken violently about 5 seconds. Then the arsenic test strip that is fitted into the turret such precisely that the red line which was imprinted on the strip was putted behind the reaction bottle. A new, white-colored cap that contains an arsenic testing strip was inserted after the yellow cap was removed. Stopwatch must be used during the experiments. Then after the reaction had finished, which took around 10 minutes, the white strip was carefully removed, and the color was produced matched with the Quick<sup>TM</sup> Easy Read<sup>TM</sup> color chart. So, using a test strip and a standard chart from an arsenic kit, we were able to identify the treated solution and determine the amount of arsenic which is left over. The results were then noted and recorded [1].

## Section 2

Chemical equation:

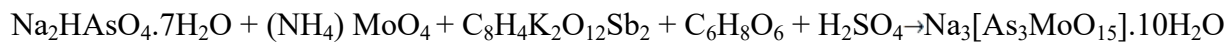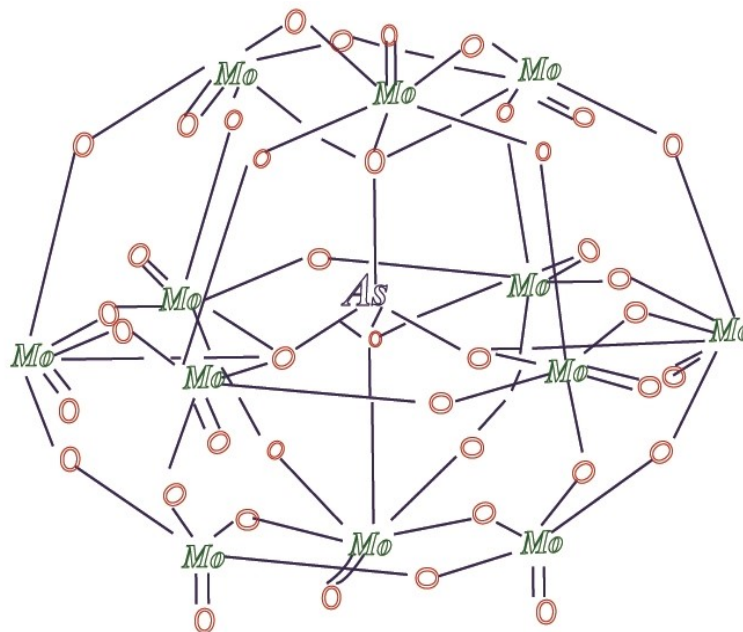

Figure S1: Structure of Arsenomolybdate blue complex [2]

**Table S1: The adsorption parameters used during the removal of arsenic from solution:**

| Parameters to be optimized           | Fixed Parameters |                    |        |                     |                                      | Variable Parameters | Optimum |
|--------------------------------------|------------------|--------------------|--------|---------------------|--------------------------------------|---------------------|---------|
|                                      | Temperature (°C) | Contact time (min) | pH     | Adsorbent dose (mg) | Initial Arsenic concentration (mg/L) |                     |         |
| Solution pH                          | 25               | 70                 | ---    | 50                  | 10                                   | 1.00 to 10.0        | 6.5 pH  |
| Temperature °C                       | ---              | 70                 | 6.5    | 50                  | 10                                   | 20 to 50 °C         | 35 °C   |
| Adsorption time (min)                | 35               | ---                | 6.5    | 50                  | 10                                   | 10 to 80.0 min      | 70 min  |
| Initial Arsenic concentration (mg/L) | 35               | 70                 | 6.5 pH | 50                  | 10                                   | 1-20 mg/L           | 10 mg/L |
| Adsorption dose (mg)                 | 35               | 70                 | 6.5    | ---                 | 10                                   | 10-70 mg/L          | 50 mg   |

### Section 3

**$\lambda$ -max Determination of Arsenomolybdate Blue complex:** First, a UV spectrophotometer was turned on, and after five minutes, a 400 nm wavelength was chosen as the initial wavelength. Then, the instrument was calibrated using distilled water for the purpose of reference solution. The sample solution was placed then in UV-spectrophotometer, and the initial absorbance at a wavelength of 400 nm was measured. After regular intervals, the absorbance was measured by keeping the difference of 10 nm. It was observed that the absorbance started to increase with time until a certain limit and after that the absorbance started to decrease. All of the absorbance measurements up to this point had been taken at regular intervals, and a graph between time and absorbance was plotted to give lambda max values of 10 ppm complex. Each sample which was comprising the untreated complex was subjected to the process and the value of absorbance constantly varied due to different concentration of  $\text{As}^{+5}$  in the solution. The maximum absorbance was recorded at 850 nm and its value is 0.825 was shown in Figure S2 [3].

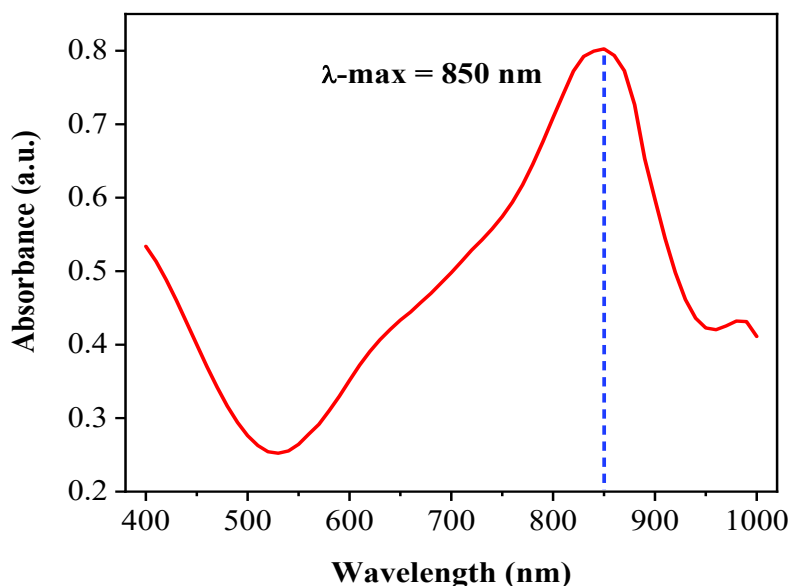

**Figure S2: Lambda max of AMC.**

**Table S2: EDX Analysis Weight and Atomic percentage of elements in as-synthesized  $\text{CuFe}_2\text{S}_x\text{O}_{4-x}$ .**

| Elements | Wt %  | At %  |
|----------|-------|-------|
| C        | 0.60  | 1.68  |
| O        | 25.89 | 54.6  |
| S        | 2.51  | 2.63  |
| Fe       | 46.8  | 28.26 |
| Cu       | 24.2  | 12.83 |
| Totals   | 100   | 100   |

**Table S3: The Comparison for adsorption capacities of  $\text{CuFe}_2\text{O}_4$  and  $\text{CuFe}_2\text{S}_x\text{O}_{4-x}$ .**

| Adsorbent                                    | pH  | Adsorption capacity of As (III) (mg/g)            | Adsorption capacity of As (V) (mg/g) | Time   | Reference                 |
|----------------------------------------------|-----|---------------------------------------------------|--------------------------------------|--------|---------------------------|
| $\text{MnFe}_2\text{O}_4$ NCs                | -   | 22.27                                             | -                                    | -      | [4]                       |
| $\text{Fe}_3\text{O}_4$ Particles            | -   | 6.77                                              | 7.23                                 | 2 h    | [5]                       |
| $\text{Fe}_2\text{O}_3/\text{MnO}_2$         | 6.2 | 2.89                                              | 3.84                                 | 12 h   | [6]                       |
| $\text{CuFe}_2\text{O}_4$ (powder)           | 7.3 | 41.2                                              | -                                    | 3 h    | [7]                       |
| Fe-Cu binary oxide                           | 7.9 | 122.3                                             | 82.7                                 | 24 h   | [8]                       |
| $\text{Mg}_{0.27}\text{Fe}_{2.50}\text{O}_4$ | 5.2 | 127.4                                             | 83.2                                 | 12 h   | [9]                       |
| $\text{MnFe}_2\text{O}_4$ (powder)           | 7.5 | 94                                                | 90                                   | 24 h   | [10]                      |
| $\text{CoFe}_2\text{O}_4$ (powder)           | 7.0 | 100                                               | 74                                   | -      | [10]                      |
| Sawdust/ $\text{MnFe}_2\text{O}_4$ composite | 7.0 | 87.57                                             | 88.99                                | 8-20 h | [11]                      |
| Fe-Ni binary oxide                           | -   | 168.6                                             | 90.1                                 | -      | [12]                      |
| $\text{Fe}_2\text{O}_3$                      | -   | 20                                                | 4.9                                  | 1 h    | [13]                      |
| $\text{CuFe}_2\text{O}_4$ foam               | 6.5 | 44.0                                              | 85.4                                 | 3 h    | [14]                      |
| $\text{CuFe}_2\text{S}_x\text{O}_{4-x}$      | 6.5 | $\text{As}^{3+}$ to $\text{As}^{5+}$ (188.8 mg/g) | AMC adsorption (188.8 mg/g)          | 70 min | <a href="#">This Work</a> |
| $\text{CuFe}_2\text{O}_4$                    | 6.5 | 140.21 mg/g                                       | 140.21 mg/g                          | 70 min | <a href="#">This Work</a> |

**Table S4: Kinetic parameters: the pseudo-first-order, pseudo-second-order, liquid film diffusion model, and intra-particle diffusion model, Isotherm parameters for the Langmuir, Freundlich and Temkin model.**

| Kinetic Model            | Parameters                                  |                                    |                 |
|--------------------------|---------------------------------------------|------------------------------------|-----------------|
| Pseudo-first order       | $K_1 = 1.854 \times 10^{-3}$                | $q_e \text{ (mg/g)} = 449.03$      | $R^2 = 0.95458$ |
| Pseudo-second order      | $K_2 \text{ (g/mg)} = 2.029 \times 10^{-5}$ | $q_e \text{ (mg/g)} = 476.19$      | $R^2 = 0.89688$ |
| Liquid-film diffusion    | $K_F = 1.0223$                              | --                                 | $R^2 = 0.71585$ |
| Intra-particle diffusion | $K_d \text{ (mg/g h}^{-0.5}) = 94.206$      | --                                 | $R^2 = 0.93945$ |
| Langmuir                 | $K_L \text{ (L/mg)} = 0.972$                | $q_{\max} \text{ (mg/g)} = 188.41$ | $R^2 = 0.99981$ |
| Freundlich               | $K_F \text{ (mg/g)} = 154.84$               | $1/n = 0.11109$                    | $R^2 = 0.67479$ |
| Temkin                   | $K_T \text{ (L/mg)} = 40525.55$             | --                                 | $R^2 = 0.66186$ |

**Table S5: Comparison of Langmuir, Freundlich and Temkin models parameters with reported adsorbents.**

| Sr.no | Adsorbent                                            | $K_F$                              | $K_L$         | $K_T$           | Reference                 |
|-------|------------------------------------------------------|------------------------------------|---------------|-----------------|---------------------------|
| 1     | Manganese ferrite nanoparticles                      | 19.97 (L/g)                        | 2327.91 (L/g) | -               | [15]                      |
| 2     | Graphene oxide/CuFe <sub>2</sub> O <sub>4</sub> foam | 16.49 (mg/g)                       | 0.046 (L/mg)  | -               | [16]                      |
| 3     | Porous copper ferrite foam                           | 29.28 (mg/g)                       | 0.32 (L/mg)   | -               | [14]                      |
| 4     | Novel fabricated copper ferrite                      | 39.85                              | 0.00025       | -               | [8]                       |
| 5     | Aluminum doped manganese copper ferrite polymer      | 0.853(µg g <sup>-1</sup> )         | -             | -               | [17]                      |
| 6     | Cobalt ferrite nanoparticles                         | 175.56 (µg/g)(L/µg) <sup>1/n</sup> | -             | -               | [18]                      |
| 7     | CuFe <sub>2</sub> S <sub>x</sub> O <sub>4-x</sub>    | 154.84 (mg/g)                      | 0.972 (L/mg)  | 40525.55 (L/mg) | <a href="#">This work</a> |

## Section 4

**Sampling from Field Station:** The 25 water samples of different areas of Bahawalnagar district were collected to estimate and remove the total arsenic. The survey shows that the water taken by the hand pumps has a somewhat higher concentration of arsenic than that taken by other sources such as tube-well, motors, etc, Average 135 ppb arsenic was found in Bahawalnagar district ground drinking water which is too high then WHO limits. The results also show that in those areas where the arsenic level in drinking water is high, there are some symptoms of arsenic diseases. These were carefully examined by our team members (Ujala Quyyum, Muhammad Zeeshan Abid, and Farooq Ahmad). Arsenic contaminated water was treated with 1 g of as-synthesized  $\text{CuFe}_2\text{S}_x\text{O}_{4-x}$  adsorbent to remove arsenic at optimised conditions. The adsorption capacity of as-synthesized adsorbent is 188 mg/g, and 1 g of adsorbent can make up to 365 gallons of arsenic-free water in Bahawalnagar district, where average arsenic in water is 135 ppb. The table 1 represents the estimation of arsenic in ground drinking water and treated water samples of different areas.

## Section 5

### Protonation of AMC:

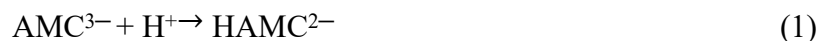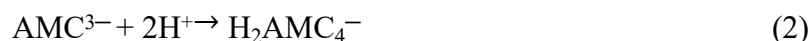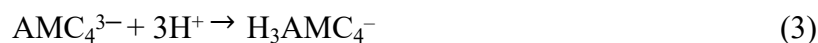

### Arsenate (AMC) adsorption:

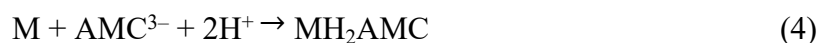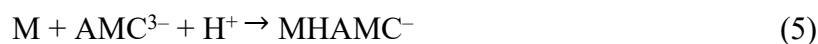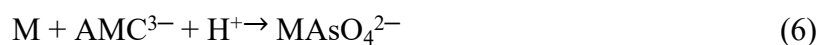

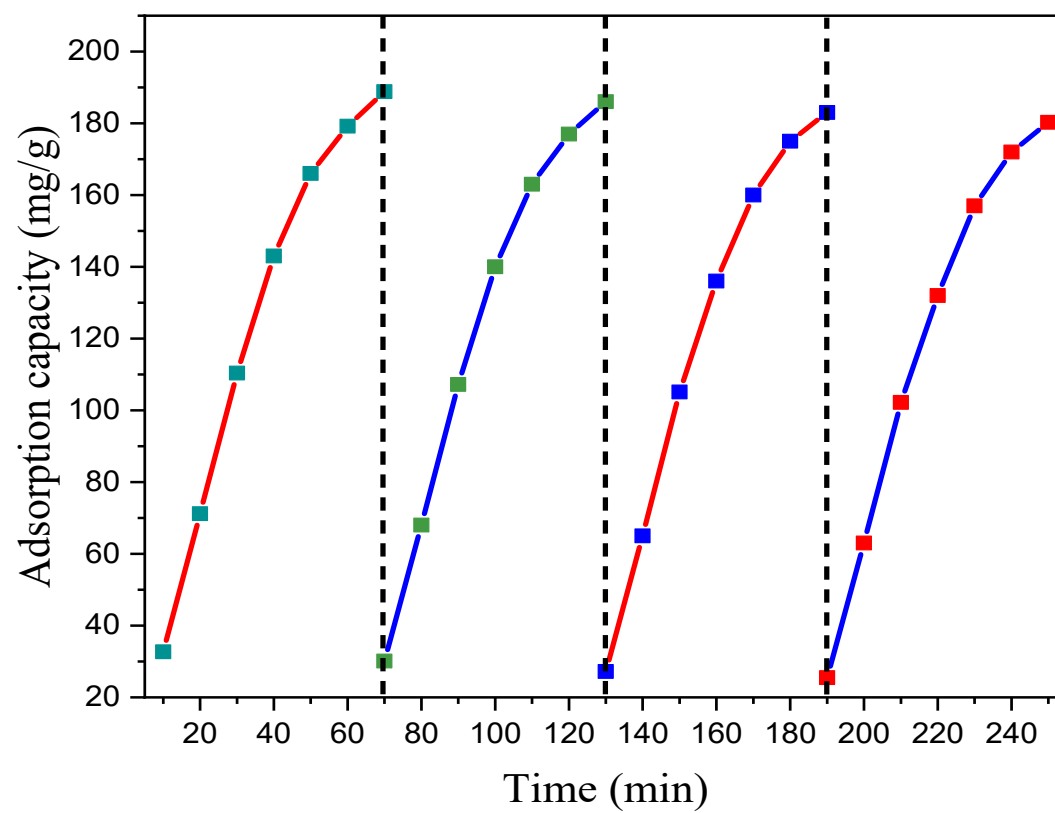

**Figure S3: Reusability of  $\text{CuFe}_2\text{S}_x\text{O}_{4-x}$ .**

## References:

1. George, C.M., et al., *Arsenic exposure in drinking water: an unrecognized health threat in Peru*. Bulletin of the World Health Organization, 2014. 92: p. 565-572.
2. Das, J. and P. Sarkar, *A new dipstick colorimetric sensor for detection of arsenate in drinking water*. Environmental Science Water Research & Technology, 2016. 2: p. 693-704.
3. Das, L., et al., *Aqueous biphasic system in differential extraction of arseno and phospho molybdenum blue: Consequent sensing of glutathione in acid-free medium*. Colloids and Surfaces A: Physicochemical and Engineering Aspects, 2021. 611: p. 125808.
4. Xu, W.-H., et al., *Superparamagnetic mesoporous ferrite nanocrystal clusters for efficient removal of arsenite from water*. CrystEngComm, 2013. 15(39): p. 7895-7903.
5. Wang, T., et al., *Controllable synthesis of hierarchical porous Fe<sub>3</sub>O<sub>4</sub> particles mediated by poly (diallyldimethylammonium chloride) and their application in arsenic removal*. ACS applied materials & interfaces, 2013. 5(23): p. 12449-12459.
6. Shan, C. and M. Tong, *Efficient removal of trace arsenite through oxidation and adsorption by magnetic nanoparticles modified with Fe–Mn binary oxide*. Water research, 2013. 47(10): p. 3411-3421.
7. Zhang, G., et al., *Nanostructured iron (III)-copper (II) binary oxide: a novel adsorbent for enhanced arsenic removal from aqueous solutions*. Water Research, 2013. 47(12): p. 4022-4031.
8. Tu, Y.-J., et al., *Arsenate adsorption from water using a novel fabricated copper ferrite*. Chemical engineering journal, 2012. 198: p. 440-448.
9. Tang, W., et al., *Superparamagnetic magnesium ferrite nanoadsorbent for effective arsenic (III, V) removal and easy magnetic separation*. Water Research, 2013. 47(11): p. 3624-3634.
10. Zhang, S., et al., *Arsenite and arsenate adsorption on coprecipitated bimetal oxide magnetic nanomaterials: MnFe<sub>2</sub>O<sub>4</sub> and CoFe<sub>2</sub>O<sub>4</sub>*. Chemical engineering journal, 2010. 158(3): p. 599-607.
11. Podder, M. and C. Majumder, *Fixed-bed column study for As (III) and As (V) removal and recovery by bacterial cells immobilized on Sawdust/MnFe<sub>2</sub>O<sub>4</sub> composite*. Biochemical Engineering Journal, 2016. 105: p. 114-135.
12. Liu, S., et al., *Micro/nanostructured porous Fe–Ni binary oxide and its enhanced arsenic adsorption performances*. Journal of colloid and interface science, 2015. 458: p. 94-102.
13. Luther, S., et al., *Removal of arsenic from aqueous solution: a study of the effects of pH and interfering ions using iron oxide nanomaterials*. Microchemical Journal, 2012. 101: p. 30-36.
14. Wu, L.-K., et al., *Highly porous copper ferrite foam: a promising adsorbent for efficient removal of As (III) and As (V) from water*. Journal of Hazardous Materials, 2018. 347: p. 15-24.
15. López-Luna, J., et al., *Linear and nonlinear kinetic and isotherm adsorption models for arsenic removal by manganese ferrite nanoparticles*. SN Applied Sciences, 2019. 1: p. 1-19.
16. Wu, L.-K., et al., *Graphene oxide/CuFe<sub>2</sub>O<sub>4</sub> foam as an efficient absorbent for arsenic removal from water*. Chemical Engineering Journal, 2018. 334: p. 1808-1819.
17. Malana, M.A., R.B. Qureshi, and M.N. Ashiq, *Adsorption studies of arsenic on nano aluminium doped manganese copper ferrite polymer (MA, VA, AA) composite: Kinetics and mechanism*. Chemical Engineering Journal, 2011. 172(2-3): p. 721-727.
18. Dey, A., R. Singh, and M. Purkait, *Cobalt ferrite nanoparticles aggregated schwertmannite: A novel adsorbent for the efficient removal of arsenic*. Journal of Water Process Engineering, 2014. 3: p. 1-9.
